# Supplementary material
Source: PubMed Central journal article supplement (PMC9724933)
Supplement: EIJ-D-21-00286_Piayda_SD.pdf [file EIJ-D-21-00286_Piayda_SD.pdf]

## Supplementary data

**Supplementary Table 1. Baseline characteristics and imaging findings in patients undergoing PDL closure.**

| <b>Baseline characteristics</b>                               | <b>n=95 patients</b> |
|---------------------------------------------------------------|----------------------|
| Age, years                                                    | 72±9                 |
| Male                                                          | 68 (71.6%)           |
| Body mass index, kg/cm <sup>2</sup>                           | 29.3±4.6             |
| Arterial hypertension                                         | 83 (87.4%)           |
| Diabetes mellitus                                             | 39 (41%)             |
| Dyslipidaemia                                                 | 68 (71.6%)           |
| Chronic heart failure                                         | 32 (33.7%)           |
| Coronary artery disease                                       | 44 (46.3%)           |
| Prior transitory ischaemic attack                             | 14 (14.7%)           |
| Prior ischaemic stroke                                        | 27 (28.4%)           |
| CHA <sub>2</sub> DS <sub>2</sub> -VASc score                  | 4 [range 3-5]        |
| HAS-BLED score                                                | 3 [range 2-4]        |
| Creatinine, mg/dL                                             | 1±0.3                |
| Estimated glomerular filtration rate, mL/min                  | 66.5±22.6            |
| Haemoglobin, g/dL                                             | 12.7±2.1             |
| <b>Medication</b>                                             |                      |
| - Single antiplatelet therapy (either aspirin or clopidogrel) | 10 (10.5%)           |
| - Dual antiplatelet therapy                                   | 17 (17.9%)           |
| - DOAC/vitamin K antagonist                                   | 39 (41.1%)           |
| - DOAC/vitamin K antagonist with single antiplatelet therapy  | 29 (30.5%)           |
| <b>Initial left atrial appendage closure device</b>           |                      |
| - WATCHMAN                                                    | 63 (66.3%)           |
| - LARIAT                                                      | 17 (17.9%)           |
| - WATCHMAN FLX                                                | 5 (5.3%)             |
| - AMPLATZER Amulet                                            | 2 (2.1%)             |
| - AMPLATZER Cardiac Plug                                      | 2 (2.1%)             |
| - Other                                                       | 6 (6.3%)             |
| <b>First detection of PDL after initial procedure, days</b>   | 90 [range 41-231]    |
| <b>Time from PDL detection to PDL closure, days</b>           | 134 [range 59.5-368] |
| <b>Imaging findings</b>                                       |                      |
| <b>Imaging modality used for detection</b>                    |                      |
| - 2D/3D transoesophageal echocardiography                     | 84 (88.4%)           |
| - Cardiac computed tomography                                 | 10 (10.5%)           |
| - Intracardiac echocardiography                               | 1 (1.1%)             |
| <b>Number of leaks per patient</b>                            |                      |
| - 1 leak                                                      | 86 (90.5%)           |
| - 2 leaks                                                     | 9 (9.5%)             |
| <b>Initial left atrial appendage anatomy</b>                  |                      |
| - Windsock                                                    | 22 (23.2%)           |
| - Chicken wing                                                | 17 (17.9%)           |
| - Cauliflower                                                 | 8 (8.4%)             |
| - Double lobe                                                 | 6 (6.3%)             |
| - Cactus                                                      | 3 (3.2%)             |
| - Other                                                       | 2 (2.1%)             |

|                                                                                  |            |
|----------------------------------------------------------------------------------|------------|
| - Not applicable                                                                 | 31 (32.6%) |
| <b>Reason for initial device implantation</b>                                    |            |
| - Gastrointestinal bleeding                                                      | 25 (26.3%) |
| - High bleeding risk, no event                                                   | 20 (21.1%) |
| - Recurrent bleeding events                                                      | 10 (10.5%) |
| - High bleeding risk with bleeding event                                         | 13 (13.7%) |
| - Intracranial bleeding                                                          | 6 (6.3%)   |
| - Poor drug compliance                                                           | 1 (1.1%)   |
| - Other reasons (i.e., combined cardiac procedures, hybrid ablation, labile INR) | 20 (21.1%) |

DOAC: direct oral anticoagulants; PDL: peri-device leakage
